# Supplementary material for: Efficacy and safety of artemether-lumefantrine and dihydroartemisinin-piperaquine for the treatment of uncomplicated Plasmodium falciparum malaria and prevalence of molecular markers associated with artemisinin and partner drug resistance in Uganda
Source: Malar J. 2021 Dec 24;20:484. doi: 10.1186/s12936-021-04021-5 (PMC8709966; doi:10.1186/s12936-021-04021-5)
Supplement: Supplementary file 1 — Additional file 1: Table S1. Raw genotyping data. [file 12936_2021_4021_MOESM1_ESM.xlsx]

## Sheet: Table 3
Table 2: Prevalence of Pfk13, Pfmdr1 and Pfcrt polymorphisms in day 0 samples (those who went on to be re-infected) and day of failure samples (recurrent or recrudescent infections) in the dihydroartemisinin-piperaquine treatment arm
Dihydroartemisinin-piperaquine treatment arm
Molecular marker	Reinfection (D0)			Recrudescent (DF) + Reinfection (DF)			pa	Recrudescent (DF)			pb
Pfk13
Wild type (no mutation detected)	#REF!	#REF!	#REF!	#REF!	#REF!	#REF!	Ref	#REF!	#REF!	#REF!	Ref
Pfmdr1†
N86	#REF!	#REF!	#REF!	#REF!	#REF!	#REF!	Ref	#REF!	#REF!	#REF!	Ref
86Y	#REF!	#REF!	#REF!	#REF!	#REF!	#REF!		#REF!	#REF!	#REF!
Y184	#REF!	#REF!	#REF!	#REF!	#REF!	#REF!	Ref	#REF!	#REF!	#REF!	Ref
184Y/F	#REF!	#REF!	#REF!	#REF!	#REF!	#REF!		#REF!	#REF!	#REF!
184F	#REF!	#REF!	#REF!	#REF!	#REF!	#REF!		#REF!	#REF!	#REF!
D1246	#REF!	#REF!	#REF!	#REF!	#REF!	#REF!	Ref	#REF!	#REF!	#REF!	Ref
1246D/Y	#REF!	#REF!		#REF!	#REF!			#REF!	#REF!
1246Y	#REF!	#REF!	#REF!	#REF!	#REF!	#REF!		#REF!	#REF!	#REF!
NYD	#REF!	#REF!	#REF!	#REF!	#REF!	#REF!	Ref	#REF!	#REF!	#REF!	Ref
YFD	#REF!	#REF!	#REF!	#REF!	#REF!	#REF!		#REF!	#REF!	#REF!
NFD	#REF!	#REF!	#REF!	#REF!	#REF!	#REF!		#REF!	#REF!	#REF!
NFY	#REF!	#REF!	#REF!	#REF!	#REF!	#REF!		#REF!	#REF!	#REF!
NYY	#REF!	#REF!	#REF!	#REF!	#REF!	#REF!		#REF!	#REF!	#REF!
YYD	#REF!	#REF!	#REF!	#REF!	#REF!	#REF!		#REF!	#REF!	#REF!
YFY	#REF!	#REF!	#REF!	#REF!	#REF!	#REF!		#REF!	#REF!	#REF!
YYY	#REF!	#REF!	#REF!	#REF!	#REF!	#REF!		#REF!	#REF!	#REF!
Note: D0: day zero; DF: day of failure; Ref: reference; aStatistical significance of difference in risk of treatment failure (reinfection or recrudescence) determined by Fisher’s exact test; bStatistical significance of difference in risk of treatment failure (recrudescence) determined by Fisher’s exact test; Bold letter denotes an encoded amino acid change; †Totals may not sum due to mixed infec…

## Sheet: NMS
			Chromosome	2				3				6					4						12					10				6				Probability of Recrudescence	Final Probability Results
			Tandem Repeats	AT				TA				ATT					ATT						TAA					TAA				AAT
			Marker Name	313 C2				383 C3				TA1					POLYA						PFPK2					2490				TA109
Country Sample ID	Lab Sample ID	Site	Treatment Arm	Allele_1	Allele_2	Allele_3	Allele_4	Allele_1	Allele_2	Allele_3	Allele_4	Allele_1	Allele_2	Allele_3	Allele_4	Allele_5	Allele_1	Allele_2	Allele_3	Allele_4	Allele_5	Allele_6	Allele_1	Allele_2	Allele_3	Allele_4	Allele_5	Allele_1	Allele_2	Allele_3	Allele_4	Allele_1	Allele_2	Allele_3	Allele_4
U01006D0	U01006D0_AL_UGTES2019	Aduku	AL	226	244			125	139			162	165	177			156	171					162					81				166	178			0.334737	Reinfection
U01006D28	U01006D28_AL_UGTES2019	Aduku	AL	246				157				162	177				153	162					174					81	84			175
U01010D0	U01010D0_AL_UGTES2019	Aduku	AL	240				141				177					141						165					81				175				0	Reinfection
U01010D21	U01010D21_AL_UGTES2019	Aduku	AL	232				155				159					153						159					81				148	202
U01015D0	U01015D0_DP_UGTES2019	Aduku	DP	224				123	145			159	165	168	171	174	153	183					171	195				81				175				0.407956	Reinfection
U01015D42	U01015D42_DP_UGTES2019	Aduku	DP	232	250			123				NA					150	153	165				162	168	174			72	78			163	175
U01018D0	U01018D0_AL_UGTES2019	Aduku	AL	252				125				177					195						171					81				178				0	Reinfection
U01018D21	U01018D21_AL_UGTES2019	Aduku	AL	238				153				159					144						165					78				175	202
U01029D0	U01029D0_AL_UGTES2019	Aduku	AL	242	246			135	137			165	168				156	165					156	165				81				163	172			0	Reinfection
U01029D28	U01029D28_AL_UGTES2019	Aduku	AL	248				125				159					156						159	171	213			81				166
U01034D0	U01034D0_AL_UGTES2019	Aduku	AL	224	242	246		127	139			159					150	153	156				162					72	78	81		163	184			0.0655441	Reinfection
U01034D28	U01034D28_AL_UGTES2019	Aduku	AL	230				123				171	174				153	174	195				165					78	84			133	175
U01035D0	U01035D0_AL_UGTES2019	Aduku	AL	232	242			143				165	168				162	165					159					78	84			169	178			0	Reinfection
U01035D21	U01035D21_AL_UGTES2019	Aduku	AL	246				151				135					159						186					78				160
U01037D0	U01037D0_AL_UGTES2019	Aduku	AL	252				123				168					171						159	165				81				187				0	Reinfection
U01037D28	U01037D28_AL_UGTES2019	Aduku	AL	230				169				168					156						162					81				160
U01055D0	U01055D0_AL_UGTES2019	Aduku	AL	238				153				159					144						165					78				172				0	Reinfection
U01055D21	U01055D21_AL_UGTES2019	Aduku	AL	230				123	139			159	171				177						165					78	81			163	172
U01056D0	U01056D0_AL_UGTES2019	Aduku	AL	242				123	127			168	171				153						162					81				178				0.141279	Reinfection
U01056D28	U01056D28_AL_UGTES2019	Aduku	AL	238	258			125				165					162						168					81				178
U01057D0	U01057D0_AL_UGTES2019	Aduku	AL	230				139				168					153						171					81				166				0	Reinfection
U01057D28	U01057D28_AL_UGTES2019	Aduku	AL	258				151				NA					138	153	162				162	168	177			72				124	133	202
U01058D0	U01058D0_AL_UGTES2019	Aduku	AL	240				145				168	174				144	156					189					81				163				0	Reinfection
U01058D28	U01058D28_AL_UGTES2019	Aduku	AL	244				123				159					153						168					81				172
U01061D0	U01061D0_DP_UGTES2019	Aduku	DP	264				123				171					162						165					81				175				0.943807	Recrudescence
U01061D42	U01061D42_DP_UGTES2019	Aduku	DP	256				123				162	171	174			150	162					162	165	168			81				148	163
U01063D0	U01063D0_AL_UGTES2019	Aduku	AL	234				137				162	171				156	162					165	183				78	81			163	178			0.206699	Reinfection
U01063D21	U01063D21_AL_UGTES2019	Aduku	AL	220	232	242	252	125				162	168				150						165	171	177			72	81			166	178
U01065D0	U01065D0_AL_UGTES2019	Aduku	AL	242	260			125				162	168				159	168					162	180				72	81			160				0.876255	Recrudescence
U01065D21	U01065D21_AL_UGTES2019	Aduku	AL	224				147				162					168						162					81				124	166	202
U01067D0	U01067D0_DP_UGTES2019	Aduku	DP	240				139				180					159						162					81				163				0.100962	Reinfection
U01067D35	U01067D35_DP_UGTES2019	Aduku	DP	220				123	141			159	174				150	159	168				162	168				81				178
U01072D0	U01072D0_AL_UGTES2019	Aduku	AL	228	236			125	139			159	168	174	177		150	153	165				162	171	183			72	78	81		163	178			0.555253	Recrudescence
U01072D28	U01072D28_AL_UGTES2019	Aduku	AL	218				125				165	168				144	150	153				165	171	186			72	81			124	133	202
U01081D0	U01081D0_DP_UGTES2019	Aduku	DP	238				123				171					144						162					81				160				0	Reinfection
U01081D35	U01081D35_DP_UGTES2019	Aduku	DP	232	240			127				162	174				144	171					165	171				81				166
U01084D0	U01084D0_DP_UGTES2019	Aduku	DP	236				145				159					150						162					81				163				0	Reinfection
U01084D42	U01084D42_DP_UGTES2019	Aduku	DP	238				159				162					156						162	171				78				178
U01085D0	U01085D0_AL_UGTES2019	Aduku	AL	222	226			147				NA					156						162	168	174			81				184				0.167933	Reinfection
U01085D23	U01085D23_AL_UGTES2019	Aduku	AL	262				139				165					159						162					81				160
U01086D0	U01086D0_DP_UGTES2019	Aduku	DP	238				123				171					150	153	159				150	159	168			78	84			163	178			0	Reinfection
U01086D42	U01086D42_DP_UGTES2019	Aduku	DP	NA				NA				NA					168	174	177	195			162	165	168			NA				166
U01087D0	U01087D0_AL_UGTES2019	Aduku	AL	242				149				168					153						162					72				178				0	Reinfection
U01087D21	U01087D21_AL_UGTES2019	Aduku	AL	NA				NA				NA					183	195					168					NA				124	187	202
U01090D0	U01090D0_AL_UGTES2019	Aduku	AL	234	238			147				159					159	162					159	165				78	81			178	187			0.388473	Reinfection
U01090D21	U01090D21_AL_UGTES2019	Aduku	AL	242				139				159	171	174			156	171					162	183				78	81			178	187
U01093D0	U01093D0_AL_UGTES2019	Aduku	AL	226				123	127			162	168				168						165					78	81			163	178			0.161992	Reinfection
U01093D28	U01093D28_AL_UGTES2019	Aduku	AL	232				123	149			159					150						171					78	81			172
U01097D0	U01097D0_DP_UGTES2019	Aduku	DP	252	268			125	137			165	174				174	192					168	174				72	81			178				0.461632	Reinfection
U01097D24	U01097D24_DP_UGTES2019	Aduku	DP	NA				NA				NA					195						162	168				81				133
U01103D0	U01103D0_DP_UGTES2019	Aduku	DP	246	278			143				159					153						159	180				81				166	178			0.349339	Reinfection
U01103D42	U01103D42_DP_UGTES2019	Aduku	DP	230	256			147				168					159						162	171	180			81				163
U01108D0	U01108D0_AL_UGTES2019	Aduku	AL	242	252			143				168	171				162	168					168					72	81			178				0.103614	Reinfection
U01108D28	U01108D28_AL_UGTES2019	Aduku	AL	232				143				165					153						159	162				84				163
U01111D0	U01111D0_AL_UGTES2019	Aduku	AL	222	234			121				165	171				150	174					162	168	171			81				163	178			0.521696	Recrudescence
U01111D28	U01111D28_AL_UGTES2019	Aduku	AL	224	234			153				162	168				153	156	159				162	168	171			81				166	178	184
U01112D0	U01112D0_AL_UGTES2019	Aduku	AL	244				125	139			165					165						168	171				81				175				0.637277	Recrudescence
U01112D28	U01112D28_AL_UGTES2019	Aduku	AL	234				125	139	171		135	168				141	156					162	165				81				175
U01116D0	U01116D0_AL_UGTES2019	Aduku	AL	240				137	145			159	168	171			144	156	162				162	165				78	81			163	178	187		0	Reinfection
U01116D15	U01116D15_AL_UGTES2019	Aduku	AL	NA				139				NA					186	195					168					NA				124	202
U01122D0	U01122D0_AL_UGTES2019	Aduku	AL	230	240	254		123	139			159	165				153	171					165	180	186			75	81			163	172			0	Reinfection
U01122D21	U01122D21_AL_UGTES2019	Aduku	AL	236				123	143			NA					195						162	168	189	213		81				124	163	202
U01125D0	U01125D0_DP_UGTES2019	Aduku	DP	224	230	236		123	141	151		159	165				156	159					162	168	174	189		72	81			151	178			0	Reinfection
U01125D14	U01125D14_DP_UGTES2019	Aduku	DP	NA				123				NA					192						171					NA				133
U01131D0	U01131D0_AL_UGTES2019	Aduku	AL	254				139				168					153						168					81				172				0	Reinfection
U01131D28	U01131D28_AL_UGTES2019	Aduku	AL	NA				NA				NA					195						171					NA				124	133	202
U01136D0	U01136D0_AL_UGTES2019	Aduku	AL	228				143				162					165						165					81				163				0	Reinfection
U01136D28	U01136D28_AL_UGTES2019	Aduku	AL	230				123				162					165						162					72				136	178
U01154D0	U01154D0_AL_UGTES2019	Aduku	AL	236				141	147			154	168				156						165	168				81				163	175			0	Reinfection
U01154D21	U01154D21_AL_UGTES2019	Aduku	AL	244				125				NA					171						NA					NA				NA
U01155D0	U01155D0_AL_UGTES2019	Aduku	AL	236				141	147			168					156						165	168				81				166				0.0836083	Reinfection
U01155D28	U01155D28_AL_UGTES2019	Aduku	AL	214				125	137			162	165	171			153	171					165	171				78	81			163
U01161D0	U01161D0_AL_UGTES2019	Aduku	AL	226				145				168					159						165					81				172				0.0781041	Reinfection
U01161D28	U01161D28_AL_UGTES2019	Aduku	AL	234				141	145			171					171						165					78				163
U01167D0	U01167D0_AL_UGTES2019	Aduku	AL	238				123	139	171		171	195				165						162	171	174			81	84			166	178			0.997322	Recrudescence
U01167D21	U01167D21_AL_UGTES2019	Aduku	AL	238				139	171			171					165						159	162				81				166
U01168D0	U01168D0_DP_UGTES2019	Aduku	DP	206	252			137				156	174				156	180					165	189				81				160				0.00200535	Reinfection
U01168D42	U01168D42_DP_UGTES2019	Aduku	DP	252				141				177					144	153	159				165					78	81			133	160
U01171D0	U01171D0_DP_UGTES2019	Aduku	DP	210				123	147			162	180				141	171					159	189				78				154	178			0	Reinfection
U01171D42	U01171D42_DP_UGTES2019	Aduku	DP	250				123				168					183						162					81				133
U01190D0	U01190D0_AL_UGTES2019	Aduku	AL	256				125	139			168					141						165	171				81				166				0.135069	Reinfection
U01190D14	U01190D14_AL_UGTES2019	Aduku	AL	NA				151				NA					159	177	183	195			168					NA				124	133	202
U01191D0	U01191D0_DP_UGTES2019	Aduku	DP	NA				123				162					177	192					168					81				178				0.00937532	Reinfection
U01191D42	U01191D42_DP_UGTES2019	Aduku	DP	224				123				165					174						168					81				178
U02012D0	U02012D0_AL_UGTES2019	Arua	AL	NA				NA				NA					195						168					NA				124	190	202		0.370602	Reinfection
U02012D28	U02012D28_AL_UGTES2019	Arua	AL	216				123	145			159					159						165					72	81	84		163	178
U02017D0	U02017D0_AL_UGTES2019	Arua	AL	236	252			121	131			165	171				153	156					168					81	84			160	184			0	Reinfection
U02017D21	U02017D21_AL_UGTES2019	Arua	AL	NA				135				NA					183	195					162					72				124	133	202
U02018D0	U02018D0_AL_UGTES2019	Arua	AL	254				147				174					153						144	168				78				172				0.000667557	Reinfection
U02018D21	U02018D21_AL_UGTES2019	Arua	AL	NA				129	161			NA					NA						NA					NA				190
U02020D0	U02020D0_AL_UGTES2019	Arua	AL	230	248			123	141			159	168				174						159					81				151	166			0.135995	Reinfection
U02020D28	U02020D28_AL_UGTES2019	Arua	AL	258				123	129			168					156						162	174				81				187
U02021D0	U02021D0_AL_UGTES2019	Arua	AL	236				141	165			168	180				171						174					78	81			178				0	Reinfection
U02021D14	U02021D14_AL_UGTES2019	Arua	AL	226	242			123	151			162	174	177			156	162					168	171				78	81	87		187
U02024D0	U02024D0_AL_UGTES2019	Arua	AL	226				137				168					156						162					81				175				0	Reinfection
U02024D21	U02024D21_AL_UGTES2019	Arua	AL	220	248	258		125	133			162	168	171			165	174					168	183				78	81			163	178
U02034D0	U02034D0_AL_UGTES2019	Arua	AL	242				145				171					165						NA					81				163				0	Reinfection
U02034D14	U02034D14_AL_UGTES2019	Arua	AL	234				137				159					195						162	171	174			81				133	166
U02035D0	U02035D0_AL_UGTES2019	Arua	AL	246				125	139			162					153						159	165				81				163	178			0.702473	Recrudescence
U02035D21	U02035D21_AL_UGTES2019	Arua	AL	254				123	135			162	174	180			144	153					165	186				81				163	178
U02039D0	U02039D0_AL_UGTES2019	Arua	AL	256				143				174					168						171	174				81				181				0	Reinfection
U02039D28	U02039D28_AL_UGTES2019	Arua	AL	234				123	135			177					165						165	168				81				175
U02040D0	U02040D0_AL_UGTES2019	Arua	AL	252				139				183					150						177	186				81				178				0.389853	Reinfection
U02040D14	U02040D14_AL_UGTES2019	Arua	AL	NA				135				NA					183	195					159	168				84				124	133	202
U02047D0	U02047D0_AL_UGTES2019	Arua	AL	238				147				186					174						162					72				163				0	Reinfection
U02047D21	U02047D21_AL_UGTES2019	Arua	AL	NA				123				168					153	195					168	174	183			75				124	133	202
U02050D0	U02050D0_DP_UGTES2019	Arua	DP	230				137	143			141	168				159						165					81				169	178			0.710227	Recrudescence
U02050D35	U02050D35_DP_UGTES2019	Arua	DP	244				123				186					156						165	174				81				160
U02052D0	U02052D0_AL_UGTES2019	Arua	AL	248				149				171					153						165					81				160				0	Reinfection
U02052D14	U02052D14_AL_UGTES2019	Arua	AL	228	238			123	145			168	171	174			174	177					159	165	174			72	81			172	187
U02057D0	U02057D0_AL_UGTES2019	Arua	AL	230				123	141			177					162	165					159	165				78				172				0	Reinfection
U02057D28	U02057D28_AL_UGTES2019	Arua	AL	256				141				174					165						168					84				160
U02059D0	U02059D0_DP_UGTES2019	Arua	DP	250				123				168					150						153					81				178				0	Reinfection
U02059D42	U02059D42_DP_UGTES2019	Arua	DP	250				137				177					180						171					81				181
U02062D0	U02062D0_AL_UGTES2019	Arua	AL	252				123	139	173		162					159						159	168				78				160				0.5192	Recrudescence
U02062D21	U02062D21_AL_UGTES2019	Arua	AL	224				143				168					150						165	168	195			81				175
U02065D0	U02065D0_AL_UGTES2019	Arua	AL	230				141				159					153						168					81	87			178				0.755212	Recrudescence
U02065D21	U02065D21_AL_UGTES2019	Arua	AL	230				123				186					165						171					81				124	190	202
U02066D0	U02066D0_AL_UGTES2019	Arua	AL	226				123	135	145		162	171				132	153					156	171				72	84			175	178			0.0274799	Reinfection
U02066D28	U02066D28_AL_UGTES2019	Arua	AL	228				137				165					156	186	195				159					81				124	133	202
U02077D0	U02077D0_DP_UGTES2019	Arua	DP	270				137				165					144						159					78				163				0	Reinfection
U02077D42	U02077D42_DP_UGTES2019	Arua	DP	234				155				159					162						177					81				133	163
U02085D0	U02085D0_AL_UGTES2019	Arua	AL	250				123	147			162	165				156	174					168	198				72	78	81		124	178	202		0.222077	Reinfection
U02085D14	U02085D14_AL_UGTES2019	Arua	AL	252				121	137			159	174				156	165					165	189				78	84			163	166	178	181
U02088D0	U02088D0_AL_UGTES2019	Arua	AL	236				123				159					174						159	162				81				175	178			0.375216	Reinfection
U02088D27	U02088D27_AL_UGTES2019	Arua	AL	224	234	248	264	123	135	145		159	174	177			153	159					186					81	87			175	178	187
U02089D0	U02089D0_AL_UGTES2019	Arua	AL	236				123	139			159					153	174					159					81				175	178			0	Reinfection
U02089D28	U02089D28_AL_UGTES2019	Arua	AL	224				123				174					159						165					84				166
U02093D0	U02093D0_AL_UGTES2019	Arua	AL	232				123	139			159	177				159						159					78	84			178	187			0.586017	Recrudescence
U02093D21	U02093D21_AL_UGTES2019	Arua	AL	228	234	252		123	141			159	168				153	159					159	162	165	168		75	78	81		175	178
U02094D0	U02094D0_DP_UGTES2019	Arua	DP	238				123	171			159					162	165	171				162	168				81				160	178			0	Reinfection
U02094D35	U02094D35_DP_UGTES2019	Arua	DP	258				137				159					168						159					78				175
U02096D0	U02096D0_AL_UGTES2019	Arua	AL	230				123	141			171	180				159						162	165	168			81				187	190			0.026756	Reinfection
U02096D14	U02096D14_AL_UGTES2019	Arua	AL	234				123	139			162	174				153						159	171				84				124	163	166	202
U02099D0	U02099D0_AL_UGTES2019	Arua	AL	234	252			139	141			159	174				144	165					159	162				72	81			163				0	Reinfection
U02099D18	U02099D18_AL_UGTES2019	Arua	AL	246				125	137			162					132						159					78				175
U02101D0	U02101D0_DP_UGTES2019	Arua	DP	226	240	250		139	153			159	165	168			156	171					159	165	189			81	93			163				0.145777	Reinfection
U02101D42	U02101D42_DP_UGTES2019	Arua	DP	NA				123	147			NA					162	183	192	195			159	168	180			78	81			133
U02106D0	U02106D0_AL_UGTES2019	Arua	AL	228	232	236	242	123				162	171				156	168					165	180				81				163	175			0.36249	Reinfection
U02106D14	U02106D14_AL_UGTES2019	Arua	AL	226				123	127			177					156						165	183				78	81			124	190	202
U02108D0	U02108D0_AL_UGTES2019	Arua	AL	236				125	139			159	177				174						159	165				81				175	181			0	Reinfection
U02108D28	U02108D28_AL_UGTES2019	Arua	AL	234				125				189					153	159					159	165				81				124	166	202
U02119D0	U02119D0_DP_UGTES2019	Arua	DP	252				147				159					156						171					81				187				0	Reinfection
U02119D42	U02119D42_DP_UGTES2019	Arua	DP	240				135				177					153						168					81				163
U02138D0	U02138D0_AL_UGTES2019	Arua	AL	230	236			123	137			159	168				144	153	159				159	162				81				163	166	175	187	0	Reinfection
U02138D14	U02138D14_AL_UGTES2019	Arua	AL	242				123				162					153	162					159	165	168			81				124	178	202
U02142D0	U02142D0_DP_UGTES2019	Arua	DP	220				155				177					156						159					78				178				0	Reinfection
U02142D35	U02142D35_DP_UGTES2019	Arua	DP	NA				139				171					141	156					165	171				78				133	175
U02145D0	U02145D0_AL_UGTES2019	Arua	AL	240				125	155			153	162	174			159						162	183				81	87			163	178			0.0468202	Reinfection
U02145D21	U02145D21_AL_UGTES2019	Arua	AL	226				125				159	162				171						159	165				78	84			166	190
U02148D0	U02148D0_DP_UGTES2019	Arua	DP	220	230	250	274	123	143			165	168	189			153	171					165	171				84				160	166			0.744491	Recrudescence
U02148D42	U02148D42_DP_UGTES2019	Arua	DP	234				123	143			NA					153						165	183				72	78	81		133
U02150D0	U02150D0_DP_UGTES2019	Arua	DP	234				153				171					165						174					81				187				0	Reinfection
U02150D35	U02150D35_DP_UGTES2019	Arua	DP	NA				123				159	162				183	195					156	171	213			72	81			133
U02151D0	U02151D0_AL_UGTES2019	Arua	AL	236				125				168					150						162	174				81				175				0	Reinfection
U02151D21	U02151D21_AL_UGTES2019	Arua	AL	224	244			123	139			159					153	162					162	165				78	81			124	166	202
U02157D0	U02157D0_AL_UGTES2019	Arua	AL	224				137				174					168						171					72				163	175			0.478424	Reinfection
U02157D28	U02157D28_AL_UGTES2019	Arua	AL	246				123	143			159	177				153	165					162	180				72	78			163	178
U02159D0	U02159D0_DP_UGTES2019	Arua	DP	264				129				171					165						168					81				160				0	Reinfection
U02159D21	U02159D21_DP_UGTES2019	Arua	DP	222	254			123	171			171					150	168					168	189				81				160	175
U02160D0	U02160D0_AL_UGTES2019	Arua	AL	250				137				159	171	177			141	168					165	171				72	81			166	178			0.0147238	Reinfection
U02160D28	U02160D28_AL_UGTES2019	Arua	AL	240				123				180					153						159	162	168			84				124	175	202
U02161D0	U02161D0_AL_UGTES2019	Arua	AL	232	260			123	139			159	162				153	162					162	165				81				175	178			0	Reinfection
U02161D28	U02161D28_AL_UGTES2019	Arua	AL	252				127	149			168					150	177	195				162					81				124	202
U02167D0	U02167D0_AL_UGTES2019	Arua	AL	250				131	151			183					162						165					72				175				0	Reinfection
U02167D28	U02167D28_AL_UGTES2019	Arua	AL	242				123	139			177					159						174					81				163
U02183D0	U02183D0_AL_UGTES2019	Arua	AL	214	226			123	132	141		159	162				141	153	162				162	165	180			81				124	163	172	202	0.595993	Recrudescence
U02183D28	U02183D28_AL_UGTES2019	Arua	AL	240				141	151			168					156						168	192				78	81			124	178	202
U02185D0	U02185D0_AL_UGTES2019	Arua	AL	234	260			123	141			144					153	156					165	180				78	81			166				0.125064	Reinfection
U02185D28	U02185D28_AL_UGTES2019	Arua	AL	232				123	131			159	165				153	159					162	168				78	81			124	178	202
U02189D0	U02189D0_DP_UGTES2019	Arua	DP	234				123				165	177				150	165					159	186				72	81			160				0	Reinfection
U02189D35	U02189D35_DP_UGTES2019	Arua	DP	238	244	250		123	133	143	153	159	171	174	177		153	156	159	162	171		162	168	174			81	84			163	175
U02190D0	U02190D0_AL_UGTES2019	Arua	AL	244				123	141			171	177				141	153					168	171				72	81			163				0	Reinfection
U02190D21	U02190D21_AL_UGTES2019	Arua	AL	256				123	145			159	168				153	162					162	165	189			78	84			163	166	187
U02193D0	U02193D0_DP_UGTES2019	Arua	DP	212	246	260		123	143			159	162	168	174		150	153	156	165			162	168				78	81			163	178			0	Reinfection
U02193D28	U02193D28_DP_UGTES2019	Arua	DP	222				137				171					144						144					75				178
U02194D0	U02194D0_DP_UGTES2019	Arua	DP	230				143				159					138	186					162	168				78	81			163				0.636984	Recrudescence
U02194D35	U02194D35_DP_UGTES2019	Arua	DP	266				123				162					171						162	168				78	81			163
U02202D0	U02202D0_DP_UGTES2019	Arua	DP	222				135				135					153						165					81				163				0	Reinfection
U02202D42	U02202D42_DP_UGTES2019	Arua	DP	222	252			123	139			165	171				159	162					162	171				78	81			133	178	190
U02204D0	U02204D0_DP_UGTES2019	Arua	DP	230				123				159					165						168	186				81				175				0.509693	Recrudescence
U02204D42	U02204D42_DP_UGTES2019	Arua	DP	252				123	139			NA					183	192					162	168	177			81				190
U02206D0	U02206D0_AL_UGTES2019	Arua	AL	218	228			123	145			159	162	174			153	159					159	174	183			78	81			175	187			0.0427532	Reinfection
U02206D21	U02206D21_AL_UGTES2019	Arua	AL	NA				123				NA					195						171					81				124	202
U02207D0	U02207D0_AL_UGTES2019	Arua	AL	238				123	139			159	174				159						165	180				81				163	175			0.000667557	Reinfection
U02207D21	U02207D21_AL_UGTES2019	Arua	AL	234	246			123	139			162	165	174			142	150	153				162	171	174			78	81	87		163	175
U02208D0	U02208D0_AL_UGTES2019	Arua	AL	248				141				159	168				162						162	168				81				187				0.251624	Reinfection
U02208D21	U02208D21_AL_UGTES2019	Arua	AL	234				123	145			171					165						162	168	171	183		78	81			124	166	202
U02210D0	U02210D0_AL_UGTES2019	Arua	AL	216	232	244	256	125	141			165	168				153	165					159	165	168			81				163	166	178		0.0106916	Reinfection
U02210D14	U02210D14_AL_UGTES2019	Arua	AL	NA				123	147			159	171				186	195					NA					81				124	202
U02211D0	U02211D0_AL_UGTES2019	Arua	AL	236				145				159					174						165					78				124	166			0.641685	Recrudescence
U02211D21	U02211D21_AL_UGTES2019	Arua	AL	262				127				168					180						159					81				124	183	202
U02214D0	U02214D0_DP_UGTES2019	Arua	DP	252				135				162					183	192					162	171				72	81			175				0.635218	Recrudescence
U02214D35	U02214D35_DP_UGTES2019	Arua	DP	252				123				162					153						165					81				133	175
U02216D0	U02216D0_DP_UGTES2019	Arua	DP	236				123	139			159					156	168					162	165				78				190				0	Reinfection
U02216D21	U02216D21_DP_UGTES2019	Arua	DP	NA				123	139			168	174				138	153	192				165	171	183			78	81			133	160
U02219D0	U02219D0_DP_UGTES2019	Arua	DP	268				153				183					186						165					81				175	187			0	Reinfection
U02219D42	U02219D42_DP_UGTES2019	Arua	DP	236				123				168					156	162	192				165	177				81				133	160	178
U02221D0	U02221D0_DP_UGTES2019	Arua	DP	236				123	137			168					150	156					159					81				166	178			0.797395	Recrudescence
U02221D35	U02221D35_DP_UGTES2019	Arua	DP	206				139				168					150	156					171	183				78				178	187
U02226D0	U02226D0_DP_UGTES2019	Arua	DP	226				123	141			183					150						165	168	183			81				160				0.915751	Recrudescence
U02226D42	U02226D42_DP_UGTES2019	Arua	DP	NA				123	141			NA					138	150	153	195			159	168				81				133
U03001D0	U03001D0_AL_UGTES2019	Masafu	AL	232				123				162					165						162					81				181				0	Reinfection
U03001D21	U03001D21_AL_UGTES2019	Masafu	AL	218	232	250		123				159	165				150	162					165	186				78	81			166	178	184
U03003D0	U03003D0_DP_UGTES2019	Masafu	DP	246	252			123	139	145		168	174	177			132	162	168				162					81				160	178	190		0.608765	Recrudescence
U03003D42	U03003D42_DP_UGTES2019	Masafu	DP	246				139				162					150	162					165	171	186			72	78	84		163				0.608765
U03004D0	U03004D0_AL_UGTES2019	Masafu	AL	230	250			123				168	180				156						165	168				78	81			178	187			0.468291	Reinfection
U03004D21	U03004D21_AL_UGTES2019	Masafu	AL	236				137				156					153						165	168				81				124	178	202
U03005D0	U03005D0_AL_UGTES2019	Masafu	AL	228	236			123	137			165	168				159	165	177				162	165				78	81			178				0.184783	Reinfection
U03005D28	U03005D28_AL_UGTES2019	Masafu	AL	234				143				171					159						168					81				175	202
U03006D0	U03006D0_AL_UGTES2019	Masafu	AL	226	232			123	137			159	162	171			153	168					162	171				81				178				0.0502654	Reinfection
U03006D21	U03006D21_AL_UGTES2019	Masafu	AL	NA				139	155			NA					150	183	195				165	168				81				124	133	202
U03007D0	U03007D0_DP_UGTES2019	Masafu	DP	214				155				192					144						162					81				163				0	Reinfection
U03007D42	U03007D42_DP_UGTES2019	Masafu	DP	226				123				168					162						168					81				133	187			0
U03010D0	U03010D0_AL_UGTES2019	Masafu	AL	244				133				168					150						162					81				166				0	Reinfection
U03010D21	U03010D21_AL_UGTES2019	Masafu	AL	228	246			139				159					153	156					168	174	180			81	84			124	175	202
U03013D0	U03013D0_DP_UGTES2019	Masafu	DP	238				145				165					156						165					78				160				0.0193591	Reinfection
U03013D35	U03013D35_DP_UGTES2019	Masafu	DP	216				135				168					135	156	180				165					81				175				0.0193591
U03014D0	U03014D0_DP_UGTES2019	Masafu	DP	232	238			135	153			168	171				168	177					168					81				154	166			0	Reinfection
U03014D20	U03014D20_DP_UGTES2019	Masafu	DP	248				123				159	180				153						159	180				81				175				0
U03017D0	U03017D0_AL_UGTES2019	Masafu	AL	NA				NA				NA					195						168	186				NA				124	202			0.716465	Recrudescence
U03017D21	U03017D21_AL_UGTES2019	Masafu	AL	NA				125				159					153	156	159				162	165	171			78	81			124	163	175	202
U03019D0	U03019D0_AL_UGTES2019	Masafu	AL	226	232			123	147			168	177				162	165	177				162	165				78	84			163	175	178		0.612658	Recrudescence
U03019D28	U03019D28_AL_UGTES2019	Masafu	AL	218				133				153	159	171			156						159	162				84				163	175	178
U03023D0	U03023D0_AL_UGTES2019	Masafu	AL	222				143				198					153						171					90				178				0	Reinfection
U03023D21	U03023D21_AL_UGTES2019	Masafu	AL	222	240			123	143			162					153						162	165	189			81				175
U03024D0	U03024D0_AL_UGTES2019	Masafu	AL	214				137				177					198						162					81				166				0	Reinfection
U03024D21	U03024D21_AL_UGTES2019	Masafu	AL	228				151				159					150	153					165					81				124	166	202
U03026D0	U03026D0_AL_UGTES2019	Masafu	AL	230				125	141			180					142						162					78				163				0.23293	Reinfection
U03026D21	U03026D21_AL_UGTES2019	Masafu	AL	242	268			139	145			168					153	168	180				162	165	180			78	81			124	166	178	202
U03030D0	U03030D0_AL_UGTES2019	Masafu	AL	234				123	145			159	168				159	165					162	168				78	84			166	175	178		0	Reinfection
U03030D28	U03030D28_AL_UGTES2019	Masafu	AL	222				137				156					165						165	168				81	93			124	163	202
U03031D0	U03031D0_DP_UGTES2019	Masafu	DP	242				141				168					156						165					81				178				0	Reinfection
U03031D42	U03031D42_DP_UGTES2019	Masafu	DP	230	250			129				162	174				162						159					81				166				0
U03032D0	U03032D0_AL_UGTES2019	Masafu	AL	242				123				162					165						189					81				166				0.174775	Reinfection
U03032D21	U03032D21_AL_UGTES2019	Masafu	AL	222	234	244		123	141			159	177				150	165					165	177				75	81	84		124	166	178	202
U03034D0	U3034D0_AL_UGTES2019	Masafu	AL	230	252			123				168	180				156						168					81	84			175	184			0	Reinfection
U03034D21	U3034D21_AL_UGTES2019	Masafu	AL	236				143				171	177				153	171					162					81	84			172	187
U03035D0	U3035D0_AL_UGTES2019	Masafu	AL	236				123				168					165	177					165					81	84			175				0	Reinfection
U03035D14	U3035D14_AL_UGTES2019	Masafu	AL	NA				147				NA					NA						168					NA				NA
U03037D0	U03037D0_AL_UGTES2019	Masafu	AL	240				145				159					177						180	183				81				163				0.37868	Reinfection
U03037D28	U03037D28_AL_UGTES2019	Masafu	AL	226				121	153			159	168				162	168					162	168	177			81				124	163	175	202
U03038D0	U03038D0_AL_UGTES2019	Masafu	AL	236				135				159	198				180						186					81				163	166			0	Reinfection
U03038D14	U03038D14_AL_UGTES2019	Masafu	AL	234				NA				NA					NA						168					NA				124	157	202
U03042D0	U03042D0_AL_UGTES2019	Masafu	AL	234				141				165					153	171					165	180				84	87			166				0.531245	Recrudescence
U03042D21	U03042D21_AL_UGTES2019	Masafu	AL	230				131	143			162	171				153	156					162	165	168	183		78	81	87		124	178	202
U03045D0	U03045D0_AL_UGTES2019	Masafu	AL	228				123				174					171						168					81				178				0	Reinfection
U03045D21	U03045D21_AL_UGTES2019	Masafu	AL	238				139				165					150						171					81				181
U03047D0	U03047D0_AL_UGTES2019	Masafu	AL	248				123				180					153						168					81				175				0	Reinfection
U03047D14	U03047D14_AL_UGTES2019	Masafu	AL	NA				123	147			NA					156	195					186					81				124	202
U03051D0	U03051D0_AL_UGTES2019	Masafu	AL	262				123				162					141	162					165					72				151				0	Reinfection
U03051D21	U03051D21_AL_UGTES2019	Masafu	AL	246				147				171					153						162					75				178
U03052D0	U03052D0_AL_UGTES2019	Masafu	AL	232	236	262		123	127			162	168	177			162	180					162	168				72	78	84		151	166	175		0.707052	Recrudescence
U03052D21	U03052D21_AL_UGTES2019	Masafu	AL	224				123	147			159	171	174	177		150	153	162				162	165	168	189		75	78	84	87	163	175	178
U03054D0	U03054D0_AL_UGTES2019	Masafu	AL	234				123	135			159	165	168			153	186					162	171				78	84			163	178			0.905636	Recrudescence
U03054D28	U03054D28_AL_UGTES2019	Masafu	AL	250				141				159					126						162					78				124	178
U03058D0	U03058D0_AL_UGTES2019	Masafu	AL	244				123	145			174					162						168					72				154				0.304509	Reinfection
U03058D21	U03058D21_AL_UGTES2019	Masafu	AL	224	240			125	139			159	177				144	153	162				165	171				78	84	87		151	163
U03064D0	U03064D0_DP_UGTES2019	Masafu	DP	224	238			123	137			162	171	177			144	147	156	159	168		171					81				178				0.987954	Recrudescence
U03064D21	U03064D21_DP_UGTES2019	Masafu	DP	230	238			123				171					147	150	171				171					81				178				0.987954
U03066D0	U03066D0_AL_UGTES2019	Masafu	AL	228				139				168	171				144	150					168	189				81				166	175			0.0334369	Reinfection
U03066D21	U03066D21_AL_UGTES2019	Masafu	AL	226	240	248	254	123	143			159	168				153	159	177				162	168				81	87			151	178
U03067D0	U03067D0_DP_UGTES2019	Masafu	DP	ND				ND				162					159						162					78				160				0	Reinfection
U03067D42	U03067D42_DP_UGTES2019	Masafu	DP	ND				ND				171					153						159					78				160				0
U03071D0	U03071D0_DP_UGTES2019	Masafu	DP	214				123	139			159	168				147	156					165	177				81				187				0.0722894	Reinfection
U03071D35	U03071D35_DP_UGTES2019	Masafu	DP	244				123	137			165					141						168					81				166				0.0722894
U03076D0	U03076D0_AL_UGTES2019	Masafu	AL	228	250			123	139			168	174				144	153	159				174	183				72	78	84		148	163	178	202	0.688923	Recrudescence
U03076D21	U03076D21_AL_UGTES2019	Masafu	AL	248	256			135				159					156	159	180				165	186				78	84			124	163	178	202
U03078D0	U03078D0_AL_UGTES2019	Masafu	AL	226				123	139			165	174	183			153	162					162	171				81				175	178			0	Reinfection
U03078D21	U03078D21_AL_UGTES2019	Masafu	AL	232	240			139				159	168	171			144	159					168	171				81	84			166	175	187
U03079D0	U3079D0_AL_UGTES2019	Masafu	AL	226				123	139			165	174	183			150	162					159	171				81	84			175				0	Reinfection
U03079D21	U3079D21_AL_UGTES2019	Masafu	AL	232	254			137	147			159	171				159						171					84	87			163
U03080D0	U03080D0_DP_UGTES2019	Masafu	DP	230				153				174					141						168					72				163				0	Reinfection
U03080D35	U03080D35_DP_UGTES2019	Masafu	DP	252				133				162					183						171					81				178				0
U03082D0	U03082D0_DP_UGTES2019	Masafu	DP	220				123				159					144	150	159				165					72	81			166	175			0.591398	Recrudescence
U03082D42	U03082D42_DP_UGTES2019	Masafu	DP	226				123	137	165		162	171				150						162	168	189			78	81			163	175			0.591398
U03085D0	U03085D0_AL_UGTES2019	Masafu	AL	234	242			123	151			171					117	168					165	174				81	87			151				0.162224	Reinfection
U03085D14	U03085D14_AL_UGTES2019	Masafu	AL	232	242			137	139			168	177				144	153					183					81				124	190	202
U03087D0	U03087D0_AL_UGTES2019	Masafu	AL	230	240			147				162	189				126	144					159	165				84				163	202			0	Reinfection
U03087D21	U03087D21_AL_UGTES2019	Masafu	AL	216	222	226		123				165	180				153	156					156	168				81				175	187
U03088D0	U03088D0_AL_UGTES2019	Masafu	AL	252				147				165	183				174						159					81				163	187			0	Reinfection
U03088D28	U03088D28_AL_UGTES2019	Masafu	AL	234	242			123				159					141	156					162					81				166	178
U03089D0	U03089D0_AL_UGTES2019	Masafu	AL	248				133				159	165	171			162	168					162	168	186			84	87			178	190			0.216488	Reinfection
U03089D21	U03089D21_AL_UGTES2019	Masafu	AL	240				137				159	171				159						159					81				148	163
U03090D0	U03090D0_AL_UGTES2019	Masafu	AL	NA				123	137			165					177	183					162	168				81				124	163	202		0.455599	Reinfection
U03090D21	U03090D21_AL_UGTES2019	Masafu	AL	230				123	153			174					141						168					81				166
U03092D0	U03092D0_DP_UGTES2019	Masafu	DP	228	244			125				165	171				159						171					81				133	184			0	Reinfection
U03092D42	U03092D42_DP_UGTES2019	Masafu	DP	228	244			127	139			165	171				150	156					159	165				78	81			175	187			0
U03093D0	U03093D0_UGTES2019	Masafu	AL	228				139				159	165				147	156					168	186				81	90			175				Removed from the analysis	Removed from the analysis
U03093D21	U03093D21_UGTES2019	Masafu	AL	ND				ND				ND					ND						ND					ND				ND
U03094D0	U03094D0_DP_UGTES2019	Masafu	DP	248				149				165					177						162					81				184				0.357321	Reinfection
U03094D42	U03094D42_DP_UGTES2019	Masafu	DP	236				151				171					165	171	177	183			153	168				81				163				0.357321
U03097D0	U03097D0_DP_UGTES2019	Masafu	DP	224	240	248		125	139			162	171	183			135	147	159				165					72	81			160	178			0	Reinfection
U03097D25	U03097D25_DP_UGTES2019	Masafu	DP	242				125				174					144	150	171	177	192		165	168	180			81				160				0
U03099D0	U03099D0_AL_UGTES2019	Masafu	AL	234				153				198					177						168					81				187				0	Reinfection
U03099D21	U03099D21_AL_UGTES2019	Masafu	AL	234				141				174					153	177					162					72	78	81		124	178
U03103D0	U03103D0_DP_UGTES2019	Masafu	DP	250				141				159					144						162					81				160				0	Reinfection
U03103D42	U03103D42_DP_UGTES2019	Masafu	DP	NA				NA				NA					150						159					NA				133	184			0
U03104D0	U03104D0_AL_UGTES2019	Masafu	AL	254				137				156	162				129						165					81	90			175				0	Reinfection
U03104D21	U03104D21_AL_UGTES2019	Masafu	AL	212	254			139				159	180				141	174					174	189				81				151	175
U03105D0	U03105D0_DP_UGTES2019	Masafu	DP	246				145				162	180				135						162	177	189			78	81			175				0.0140751	Reinfection
U03105D42	U03105D42_DP_UGTES2019	Masafu	DP	252				141				141					156	192					171					81				133				0.0140751
U03106D0	U03106D0_AL_UGTES2019	Masafu	AL	250				123				165					159						165					81				163				0	Reinfection
U03106D21	U03106D21_AL_UGTES2019	Masafu	AL	240	246			139				165	183				165	174					174	186				78	84			163	172
U03107D0	U03107D0_DP_UGTES2019	Masafu	DP	230				147				171					150						186					81				160				0	Reinfection
U03107D42	U03107D42_DP_UGTES2019	Masafu	DP	232				139				174					156						171					81				184				0
U03108D0	U3108D0_AL_UGTES2019	Masafu	AL	224				129				159					144						177					72				178	202			0.0107239	Reinfection
U03108D26	U3108D26_AL_UGTES2019	Masafu	AL	252				123	139			162	171	174			159	162					162					84				163
U03109D0	U03109D0_AL_UGTES2019	Masafu	AL	238				147				162					156						NA					81				163				0	Reinfection
U03109D21	U03109D21_AL_UGTES2019	Masafu	AL	NA				135				177					165						159					81				124	190	202
U03110D0	U03110D0_DP_UGTES2019	Masafu	DP	224	238			137				159	177				156	162					165	177				81				166	187			0	Reinfection
U03110D35	U03110D35_DP_UGTES2019	Masafu	DP	252				125				171	189				150	174					171					81				175	190			0
U03112D0	U03112D0_AL_UGTES2019	Masafu	AL	228	242			123	141			180	183				126	156	159				162	168				72	84			163	166	175		0	Reinfection
U03112D14	U03112D14_AL_UGTES2019	Masafu	AL	NA				NA				NA					184						NA					NA				124
U03113D0	U03113D0_DP_UGTES2019	Masafu	DP	230				123				165					NA						168					81				166				0.970509	Recrudescence
U03113D42	U03113D42_DP_UGTES2019	Masafu	DP	232				123	141			186					162						162	168				81				178				0.970509
U03120D0	U03120D0_DP_UGTES2019	Masafu	DP	NA				147				183					153						168					NA				166	175			0.941861	Recrudescence
U03120D35	U03120D35_DP_UGTES2019	Masafu	DP	234				123	137	147		168	177				150						165	174				78	81			169	175			0.941861
U03122D0	U03122D0_AL_UGTES2019	Masafu	AL	242				171				174					159						159					81				166				0	Reinfection
U03122D28	U03122D28_AL_UGTES2019	Masafu	AL	222				149				189					141						165					81				166
U03125D0	U03125D0_DP_UGTES2019	Masafu	DP	232				123	151			159	168				150	156	159	168	171	174	162	168				81	87			166	175			0.680274	Recrudescence
U03125D35	U03125D35_DP_UGTES2019	Masafu	DP	222	258	262		139				168	171				141	150	162	171			162	168				78	81	84		163	166	175		0.680274
U03126D0	U03126D0_AL_UGTES2019	Masafu	AL	224				123	137			159	168				153	156	165				162	192				81				163	175	178		0	Reinfection
U03126D28	U03126D28_AL_UGTES2019	Masafu	AL	224	234	238		123	135			159	162	174			159	162	174				159	165				81				163	166	178
U03128D0	U03128D0_DP_UGTES2019	Masafu	DP	232	240			123	137			162					141	150					159	165				81				175				0	Reinfection
U03128D28	U03128D28_DP_UGTES2019	Masafu	DP	240	260			123				165					156	165					165					78	81			190				0
U03133D0	U03133D0_AL_UGTES2019	Masafu	AL	236				137				177					150						165					81				163				0	Reinfection
U03133D21	U03133D21_AL_UGTES2019	Masafu	AL	258				143				171					132						171					81				175
U03134D0	U03134D0_AL_UGTES2019	Masafu	AL	216				123	131			162	168	195			141						162	171				84				166				0.146407	Reinfection
U03134D19	U03134D19_AL_UGTES2019	Masafu	AL	258				121	135			171					138	153					174	180	186			78	81			124	178	202
U03136D0	U03136D0_AL_UGTES2019	Masafu	AL	234				143				132					174						165					81				166				0	Reinfection
U03136D21	U03136D21_AL_UGTES2019	Masafu	AL	250				143				171					153						162	171				81				166	178
U03137D0	U03137D0_AL_UGTES2019	Masafu	AL	220	232			139	171			135	174				156	171					162					84	90			148	163	178		0.495819	Reinfection
U03137D21	U03137D21_AL_UGTES2019	Masafu	AL	234				147				165					174						171					81				163	175
U03138D0	U03138D0_AL_UGTES2019	Masafu	AL	222				121	137			174	177				153	156					165	171				81	87			178	187			0	Reinfection
U03138D21	U03138D21_AL_UGTES2019	Masafu	AL	NA				139				NA					159	183					174					81				124	133	202
U03141D0	U03141D0_AL_UGTES2019	Masafu	AL	226				135				159	198				156	159					162	171				78	81			175	178			0.275562	Reinfection
U03141D21	U03141D21_AL_UGTES2019	Masafu	AL	244				123	141			159					171						165					81				124	175
U03146D0	U03146D0_DP_UGTES2019	Masafu	DP	248				139				159					171	174	177				162	168				72	81			160				0.98126	Recrudescence
U03146D42	U03146D42_DP_UGTES2019	Masafu	DP	216				139				168	192				162	174	177				168	174				78				175				0.98126
U03151D0	U03151D0_AL_UGTES2019	Masafu	AL	236				149				159					168						171					81				151				0	Reinfection
U03151D21	U03151D21_AL_UGTES2019	Masafu	AL	246				151				NA					144	195					168					78				124	166	202
U03154D0	U03154D0_AL_UGTES2019	Masafu	AL	250				123				165					171						183	186				81				124	187			0.513451	Recrudescence
U03154D21	U03154D21_AL_UGTES2019	Masafu	AL	NA				145	155			NA					177	186	195				177	192				84	90			124	166	202
U03157D0	U03157D0_AL_UGTES2019	Masafu	AL	226				141				159	165				159	177					165	171				81				178				0.15933	Reinfection
U03157D19	U03157D19_AL_UGTES2019	Masafu	AL	242	250			123	139			174	177				144	156					165	171				81				166	178	190
U03161D0	U03161D0_AL_UGTES2019	Masafu	AL	230				123	171			156	159				147						168	189				81				163				0	Reinfection
U03161D21	U03161D21_AL_UGTES2019	Masafu	AL	258				131	139			174					156						159					81				175	202
U03163D0	U03163D0_DP_UGTES2019	Masafu	DP	220				125	137			159	177				162	165	168				171	192				81				166	190			0.622631	Recrudescence
U03163D35	U03163D35_DP_UGTES2019	Masafu	DP	232				159				168					141	156	162				162					81				178				0.622631
U03165D0	U03165D0_DP_UGTES2019	Masafu	DP	240	246			123	137	149		168	177				135	150	165				165					81	90			166				0.166592	Reinfection
U03165D35	U03165D35_DP_UGTES2019	Masafu	DP	222	238			123	131			159	174				156	159					159	165	183			81				166				0.166592
U03166D0	U03166D0_AL_UGTES2019	Masafu	AL	234				147				177					156						165	168				81				151				0.257476	Reinfection
U03166D21	U03166D21_AL_UGTES2019	Masafu	AL	NA				137	141			174					168						159					78				124	175	202
U03167D0	U03167D0_AL_UGTES2019	Masafu	AL	214	228	236		123				162	168				156	159	165				159	165				78	84	87		178	190			0.777266	Recrudescence
U03167D21	U03167D21_AL_UGTES2019	Masafu	AL	256				137				183					165	186					165					78				124	178	202
U03170D0	U03170D0_AL_UGTES2019	Masafu	AL	236	242	252		123	139			159	162	168			129	165	174				171					78				175	190			0	Reinfection
U03170D28	U03170D28_AL_UGTES2019	Masafu	AL	256				141	165			171					144						177					78				163
U03173D0	U03173D0_AL_UGTES2019	Masafu	AL	228				123				174					165						189					78				166				0	Reinfection
U03173D28	U03173D28_AL_UGTES2019	Masafu	AL	244				145				171					162						168					78				178
U03175D0	U03175D0_AL_UGTES2019	Masafu	AL	226				123	147			162	168				159	174					162	171				81				175				0.135734	Reinfection
U03175D28	U03175D28_AL_UGTES2019	Masafu	AL	246				141				180					171						162					81				124	166	202
U03183D0	U03183D0_AL_UGTES2019	Masafu	AL	222	236			151				168					144	165					165	171				78	81			166	178			0	Reinfection
U03183D21	U03183D21_AL_UGTES2019	Masafu	AL	NA				143				NA					195						168					78				124	202
U03187D0	U03187D0_AL_UGTES2019	Masafu	AL	230	240			123	131	171		159	165	168			153						162	171	180			78	81			163	181			0.370557	Reinfection
U03187D28	U03187D28_AL_UGTES2019	Masafu	AL	242				143				159	168				168						165					78				124	187	190	202
U03190D0	U03190D0_AL_UGTES2019	Masafu	AL	222	236			137				159	174				156	168					162	174				81				166	178			0	Reinfection
U03190D14	U03190D14_AL_UGTES2019	Masafu	AL	246				123	131			159					141						165					81				124	202
U03193D0	U03193D0_DP_UGTES2019	Masafu	DP	256				125				159					108	159					165	192				78	84			166	184			0	Reinfection
U03193D42	U03193D42_DP_UGTES2019	Masafu	DP	222				139				171					144						144					75				133				0
U03197D0	U03197D0_AL_UGTES2019	Masafu	AL	224	240	248		123	139			159	162	171			141	150	159				162	165				72	81			163	178			0.264908	Reinfection
U03197D21	U03197D21_AL_UGTES2019	Masafu	AL	NA				143				NA					177						NA					NA				124	202
Notes
No Amplification (NA)
Not Tested (ND)
Information Not Provided (INP)
